# Supplementary material for: HDACs Gene Family Analysis of Eight Rosaceae Genomes Reveals the Genomic Marker of Cold Stress in Prunus mume
Source: MDPI journal article supplement (doi:10.3390/ijms23115957), 2022-05-25
Supplement: s1 [file s1]

|                     |                                                                 |     |
|---------------------|-----------------------------------------------------------------|-----|
| AtHDA8_AT1G08460.1_ | .....MVTNRVDVFWHEGMLRHDAVEGVFDTGYDPGFLLVLEKHFENADRVRNMLISIL     | 53  |
| Pm001496            | MAASTATAFTDRIDVFWDSGMLNHNNSGNGVFDTCMDPGFLLVLEKHPENS DRVKNMVISIL | 60  |
| Pm017060            | MAASTATAFTDRIDVFWDSGMLNHNNSGNGVFDTCMDPGFLLVLEKHPENS DRVKNMVISIL | 60  |
| Consensus           | t r dvfw gml h gvfdtg dpgfldvlekhpen drv nm sil                 |     |
| AtHDA8_AT1G08460.1_ | RRGPTAFHVNVFTICLFAIVSELI MEHTSEYIEKLVEADKSGERCEIAAGTFMSPGSWEEAA | 113 |
| Pm001496            | KRGPTISFYISWLPGRPMLISELISFHSSEYINELVEADRDGGK.MLCSGTFLNPGSWDAS   | 119 |
| Pm017060            | KRGPTISFYISWLPGRPMLISELISFHSSEYINELVEADRDGGK.MLCSGTFLNPGSWDAS   | 119 |
| Consensus           | rgpi p w g p sell fh seyi lvead g gtf pgsw a                    |     |
| AtHDA8_AT1G08460.1_ | LLAAGTTLSAMQHILDCCHKIAYAIIVREPGHHSOPTQADGYCFINNAALAVKIALNSGSC   | 173 |
| Pm001496            | LLAAGTTLSAMKHVLEGHGKIAYAIIVREPGHHAQPTRADGYCFINNAGLAVQFALNSGAC   | 178 |
| Pm017060            | LLAAAYS.....SRWILLP.....DNAGLAVQIALNSGAC                        | 148 |
| Consensus           | llaa l p na lav alnsg c                                         |     |
| AtHDA8_AT1G08460.1_ | SRVAVIDIDVHYGNGTAEFCFVTSCKVLTIVSLHMHGSWGSSHPQKGSIDELCEIDVGLCYN  | 233 |
| Pm001496            | AKVAVIDIDVHYGNGTAEFCFYRSCKVLTISLHMHGSWGSSHPQNGSVDELCEAEFCGYN    | 238 |
| Pm017060            | AKVAVIDIDVHYGNGTAEFCFYRSCKVLTISLHMHGSWGSSHPQNGSIDELCEGEGENYN    | 208 |
| Consensus           | vavididvhyngtae fy sdkvlt slhm hsgwg shpq gs del e g yn         |     |
| AtHDA8_AT1G08460.1_ | LNIPLENGTGDRGYEYAMNELVVFVAVRFEEDMVLVVGQDSSAVSS.....FFAQ         | 284 |
| Pm001496            | LNIPLENGTGDRGYRHAMTELVVEMIQKFEEMVVIIGQDSSAFDPNGRQCLTMEGYQE      | 298 |
| Pm017060            | LNIPLENGTGDRGYKHDTELVVEMIQKFEEMVVLVAGQDSSAGSKGR.....FAQSSD      | 264 |
| Consensus           | ln plp gtgdrgy m elvvp f p m vlv gqdssa                         |     |
| AtHDA8_AT1G08460.1_ | IR..VDYLTEHLLR.....VLFATIVLVTSKSLMYAAPIWICCDKSA.....            | 324 |
| Pm001496            | IGRIVRSLADRHCSGRLLIVQEGGYHTYSAYCLHATLEGVINLPTSLLSDPIAYYPEDE     | 358 |
| Pm017060            | VGLCASCDDDTCL.....LCFRFGSSELRQVVVPSEHPLLAGRKTCLPWCS             | 312 |
| Consensus           |                                                                 |     |
| AtHDA8_AT1G08460.1_ | .....                                                           | 324 |
| Pm001496            | ALAVEVIKSIKKFQKDNVFFLK                                          | 381 |
| Pm017060            | ITLG.....                                                       | 316 |
| Consensus           |                                                                 |     |

Figure S1 Sequences alignment of HDA8 homologous proteins in *Arabidopsis* and mei.

|            |                                                                                     |     |
|------------|-------------------------------------------------------------------------------------|-----|
| PQP91789.1 | MELLTVSFSSSLAGNALFLARQHLCWKWNSRFDLEAKFVRNRI LNKSRLRGRRC LSEKREASISCSCTGTGEDPLIPV NK | 80  |
| PQP94174.1 | .....                                                                               | 0   |
| PQP91793.1 | .....                                                                               | 0   |
| Consensus  |                                                                                     |     |
| PQP91789.1 | KLSDARVIYAVAPAMGHNQESHPE SHFRVPAIVNALEKWELSEKFRGLEVIELENFNAASSNDIASVHTRAYVSGLEKAM   | 160 |
| PQP94174.1 | .....MGHNQESHPE SHFRVPAIVNALEKWELSEKFRGLEVIELENFNAASSNDIASVHTRAYVSGLEKAM            | 66  |
| PQP91793.1 | .....MANEQTLSEIDSSIDSTQVTLLKNLEAGRHPILVQ....AM                                      | 37  |
| Consensus  | p e v am                                                                            |     |
| PQP91789.1 | DQASKQGIILIEGSGPTYATVDTERESLVAAGAGISLIDAVV.....AESKISKSPPVGFALIRPPGHH               | 224 |
| PQP94174.1 | DQASKQGIILIEGSGPTYATVDTERESLVAAGAGIALIDAVV.....AESKISKSPPVGFALIRPPGHH               | 130 |
| PQP91793.1 | DQASKQGIILIEGSGPTYATVDTERESLVAAGAGIALIDAVILFEVVSFFNTSEFIARVAESKISKSPPVGFALIRPPGHH   | 117 |
| Consensus  | dqaskqgiiliegs gptyatvdtf eslvaagagi lidav aeskiskspvpgfalirppghh                   |     |
| PQP91789.1 | AIPKGPMSGFCVFGNVAVAARYAQRSHGLKRVFIIDFDVHHGNGTNDAFYDDPDIFFLSTHQDGSYPGCKFEEVGHGDGE    | 304 |
| PQP94174.1 | AIPKGPMSGFCVFGNVAVAARYAQRSHGLKRVFIIDFDVHHGNGTNDAFYDDPDIFFLSTHQDGSYPGCKFEEVGHGDGE    | 210 |
| PQP91793.1 | AIPKGPMSGFCVFGNVAVAARYAQRSHGLKRVFIIDFDVHHGNGTNDAFYDDPDIFFLSTHQ..VWICGGLV.....       | 186 |
| Consensus  | aipkgpmgfcvfgnvavaaryaq shglkrvfiidfdvhhgngtndafyddpdifflsthq g g                   |     |
| PQP91789.1 | GTTLNLPLPGSGDTAMRTVFDEIIVPCAQRFPDIILVSAGYDAHVLDPLASLQFTTGTYYMLASYIQQLANDLCGGRC      | 384 |
| PQP94174.1 | GTTLNLPLPGSGDTAMRTVFDEIIVPCAQRFPDIILVSAGYDAHVLDPLASLQFTTGTYYMLASYIQQLANDLCGGRC      | 290 |
| PQP91793.1 | .....                                                                               | 186 |
| Consensus  |                                                                                     |     |
| PQP91789.1 | VFFLEGGYNLKSLSYSVADSFR AFLGEP SLASEFDNPAILHEEPSTRVRQA IERVKHIHS                     | 444 |
| PQP94174.1 | VFFLEGGYNLKSLSYSVADSFR AFLGEP SLASEFDNPAILYEEPSTRVRQA IERVKHIHS                     | 350 |
| PQP91793.1 | .....                                                                               | 186 |
| Consensus  |                                                                                     |     |

Figure S2 Sequences alignment of three PyHDA14 homologous proteins in Somei-Yoshino.

|            |                                                                                    |     |
|------------|------------------------------------------------------------------------------------|-----|
| HF10663-RA | MDTGGSNLSVSGPDGVKRVSYFYDPEVGNYYYGGQHPMKPHRIRMTHALLAHYGLLQNMQVLKPYPARDRDLRCRFHADDY  | 80  |
| HF36232-RA | MDTGGSNLSVSGPDGVKRVSYFYDPEVGNYYYGGQHPMKPHRIRMTHALLAHYGLLQNMQVLKPYPARDRDLRCRFHADDY  | 80  |
| HF10684-RA | MDTGGSNLSVSGPDGVKRVSYFYDPEVGNYYYGGQHPMKPHRIRMTHALLAHYGLLQNMQVLKPYPAR...DLRCRFHA... | 75  |
| Consensus  | mdtggsnsl sgpdgvkrkvsyfydpevgnnyyggqghpmkphrirmthallahyglqlqnmqvlkpypar dlcrfha    |     |
| HF10663-RA | VAFRLRNITFEQQDQLRQLKRFNVGEDCPVFDGLYSFCQTYAGGSVGGAVKLNHGICDISINWAGGLHHAKECEASGFCY   | 160 |
| HF36232-RA | VAFRLRNITFEQQDQLRQLKRFNVGEDCPVFDGLYSFCQTYAGGSVGGAVKLNHGICDISINWAGGLHHAKECEASGFCY   | 160 |
| HF10684-RA | .....ETQQDQLRQLKRFNVGEDCPVFDGLYSFCQTYAGGSVGGAVKLNHGICDISINWAGGLHHAKECEASGFCY       | 146 |
| Consensus  | etqqdqlrqlkrfnvgedcpvfdglysfcqtyaggsvggavklnhgicdisinwagglhha keasgfcy             |     |
| HF10663-RA | VNDIVLAILELLKQHERVLYVDIDIHGHDGVEEAFYTDRVMTVSFHKFGDYFPGTGDIRDIGYGKGKYYSLNVPLDDGI    | 240 |
| HF36232-RA | VNDIVLAILELLKQHERVLYVDIDIHGHDGVEEAFYTDRVMTVSFHKFGDYFPGTGDIRDIGYGKGKYYSLNVPLDDGI    | 240 |
| HF10684-RA | VNDIVLAILELLK.....                                                                 | 159 |
| Consensus  | vndivlailellk                                                                      |     |
| HF10663-RA | DDESYHYLFKPIIGKVMEIFKPGVVLQCGADSLSGDRLGCFNLSIKGHAECVRYMRSFNVPLLLGGGGYTIRNVARCW     | 320 |
| HF36232-RA | DDESYHYLFKPIIGKVMEIFKPGVVLQCGADSLSGDRLGCFNLSIKGHAECVRYMRSFNVPLLLGGGGYTIRNVARCW     | 320 |
| HF10684-RA | .....LGCFNLSIKGHAECVRYMRSFNVPLLLGGGGYTIRNVARCW                                     | 201 |
| Consensus  | lgcfnlslkghaecvrymrsfnvpllllggggytirnvarcw                                         |     |
| HF10663-RA | CYETGVALGAEIEDKMPQHEYYEYFGPDYTLHVAPSNMENKNSHMLLEEIRSKLLENLSRLQHAPSVQFCRRPPDTELPE   | 400 |
| HF36232-RA | CYETGVALGAEIEDKMPQHEYYEYFGPDYTLHVAPSNMENKNSHMLLEEIRSKLLENLSRLQHAPSVQFCRRPPDTELPE   | 400 |
| HF10684-RA | CYETGVALGAEIEDKMPQHEYYEYFGPDYTLHVAPSNMENKNSHMLLEEIRSKLLENLSRLQHAPSVQFCRRPPDTELPE   | 281 |
| Consensus  | cyetgvalgaeiedkmpqheyyeyfgpdytlhvapsnmknshmlleeirskllenls lqhapsvqfq rppdtelpe     |     |
| HF10663-RA | ENEEQDDPDERWDPDSMEVDDERKPLPSRVKKEIVEPEVKDPKGTSENARSSGYDPAVDEITTCALDMSGSGSVDEPT     | 480 |
| HF36232-RA | ENEEQDDPDERWDPDSMEVDDERKPLPSRVKKEIVEPEVKDPKGTSENARSSGYDPAVDEITTCALDMSGSGSADEFA     | 480 |
| HF10684-RA | .....DDPDERWDPDSMEVDDERKPLPSRVKKEIVEPEVKDPKGTSENARSSGYDPAVDEITTCALDMSGSGSVDEPT     | 356 |
| Consensus  | ddpderwdpsdsmevdderkplpsrvkkeivepevkdpkgtsenarssgydpavdeittg kaldmsgsgs dep        |     |
| HF10663-RA | VKVEQDTMKNPADQ                                                                     | 494 |
| HF36232-RA | VKVEQDTMKNPADQ                                                                     | 494 |
| HF10684-RA | VKVEQDTMKNPADQ                                                                     | 370 |
| Consensus  | vkveq t nkpdaq                                                                     |     |

Figure S3 Sequences alignment of three MdHDA1 homologous proteins in apple.

|             |                                                                                  |     |
|-------------|----------------------------------------------------------------------------------|-----|
| RC2G0299600 | MFFLKFGFSLMYHFVYCKDSEDNCSGLGNVLFLARQRCFNWKSPELRLHDAIFATDGILYKNLRRGRGCFSKTTEASSSF | 80  |
| RC6G0022900 | .....                                                                            | 0   |
| RC1G0265100 | .....                                                                            | 0   |
| RC6G0533000 | .....                                                                            | 0   |
| Consensus   |                                                                                  |     |
| RC2G0299600 | SNGTEESPYIPVNTKPSDARIYAVAPAMGHNQEAHPESHFRVPAIVQALDKLELTPKFRGSKVIELQNFRPASVDDITS  | 160 |
| RC6G0022900 | .....                                                                            | 0   |
| RC1G0265100 | .....                                                                            | 0   |
| RC6G0533000 | .....                                                                            | 0   |
| Consensus   |                                                                                  |     |
| RC2G0299600 | VHTQSYVSGLEKAMDQASKDGLIFIEGTGPTYATVETFQESLIAAGAGIALIDSVAESKNSRDPPTGFALIRPPGHAI   | 240 |
| RC6G0022900 | .....                                                                            | 0   |
| RC1G0265100 | .....                                                                            | 0   |
| RC6G0533000 | .....                                                                            | 0   |
| Consensus   |                                                                                  |     |
| RC2G0299600 | PKGPMGFCVFGNIAIAAHYAQRAGHLKRVFIIDFDVHHGNGTNDAFYEDDIFFLSTHQDGSYPGTGKFDEIGRGDGEET  | 320 |
| RC6G0022900 | ...MGFCVFGNIAIAAHYAQRAGHLKRVFIIDFDVHHGNGTNDAFYEDDIFFLSTHQI.....                  | 56  |
| RC1G0265100 | ...MGFCVFGNIAIAAHYAQRAGHLKRVFIIDFDVHHGNGTNDAFYEDDIFFLSTHQVT.....IFDTLSVQIYLYV    | 70  |
| RC6G0533000 | ...MGFCVFGNIAIAAHYAQRAGHLKRVFIIDFDVHHGNGTNDAFYEDDIFFLSTHQI.....                  | 56  |
| Consensus   | mgfcvfgniaiaa yaq a glk vfiidfdvhhgngtndafy d diffflsthq                         |     |
| RC2G0299600 | TLNLPLPGSGDTAMRTVFDDVIVPCAQRFKPDIIILVSAGYDAHALDPLASLQFTTGTYMLASSIQQLAKDICGGRCVF  | 400 |
| RC6G0022900 | .....                                                                            | 56  |
| RC1G0265100 | LVMIV.....                                                                       | 75  |
| RC6G0533000 | .....                                                                            | 56  |
| Consensus   |                                                                                  |     |
| RC2G0299600 | FLEGGYNLDSLSYSVADSFR AFLKEPSLASTFDNPAMLYEEPSMKIKQAIQRVKHLHS                      | 458 |
| RC6G0022900 | .....                                                                            | 56  |
| RC1G0265100 | .....                                                                            | 75  |
| RC6G0533000 | .....                                                                            | 56  |
| Consensus   |                                                                                  |     |

Figure S4 Sequences alignment of the four RcHDA14 homologous proteins in rose.

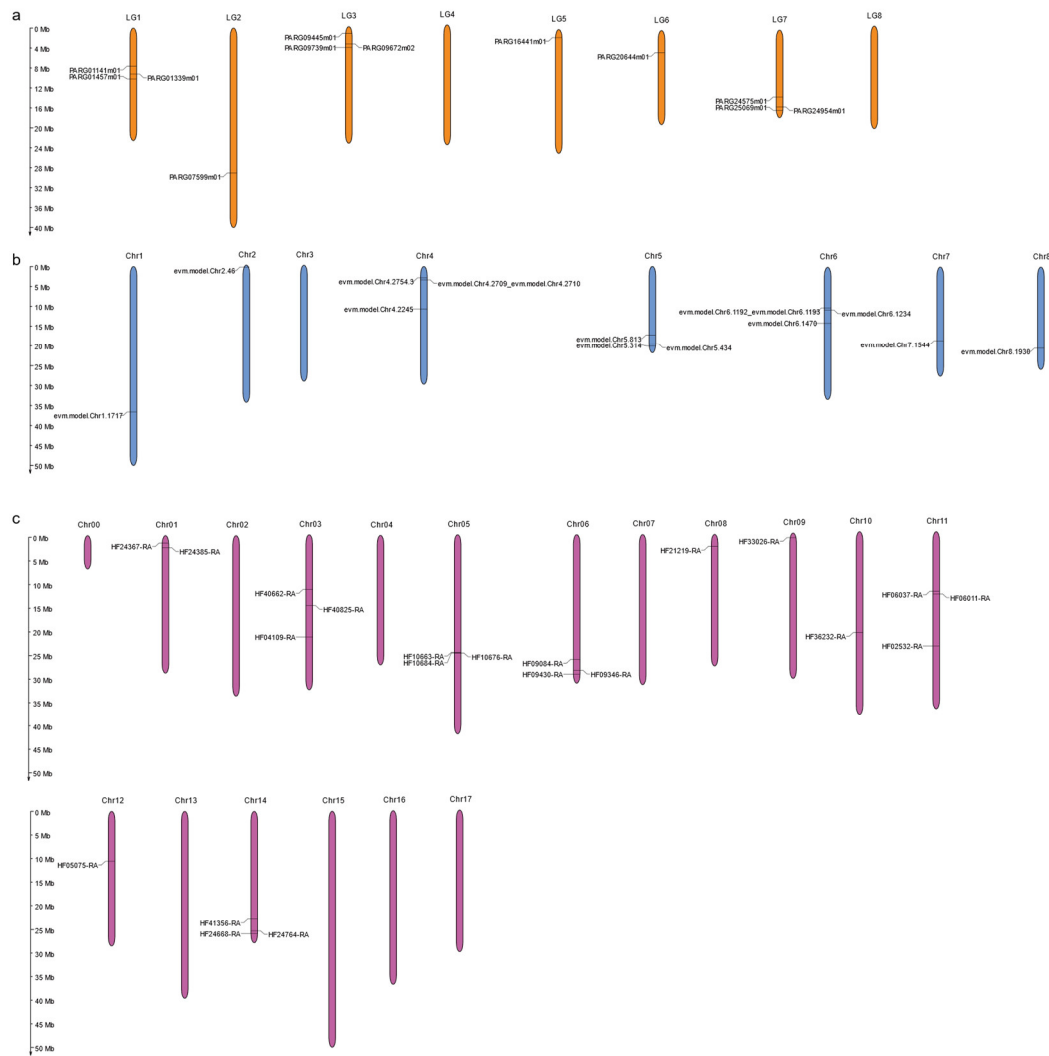

Figure S6 Gene locations of *HDACs* on the chromosome. a.The *ParHDACs* genes of *P. armeniaca* b.The *PyHDACs* genes of *P. yedoensis* c.The *MdHDACs* genes of *M. domenstica*

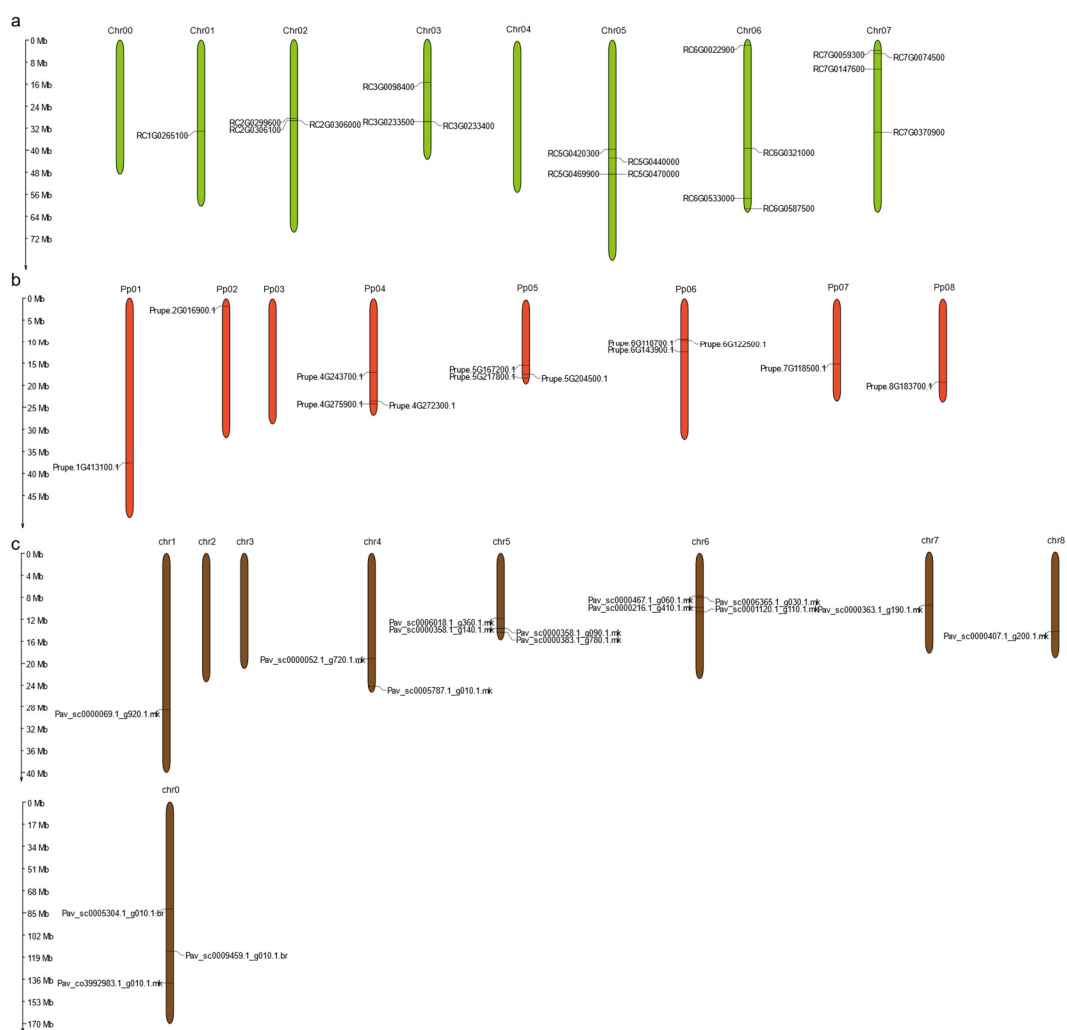

Figure S7 Gene locations of *HDACs* on the chromosome. a.The *RcHDACs* genes of *R. chinensis* b.The *PpHDACs* genes of *P.persica* c.The *PavHDACs* genes of *P.avium*.

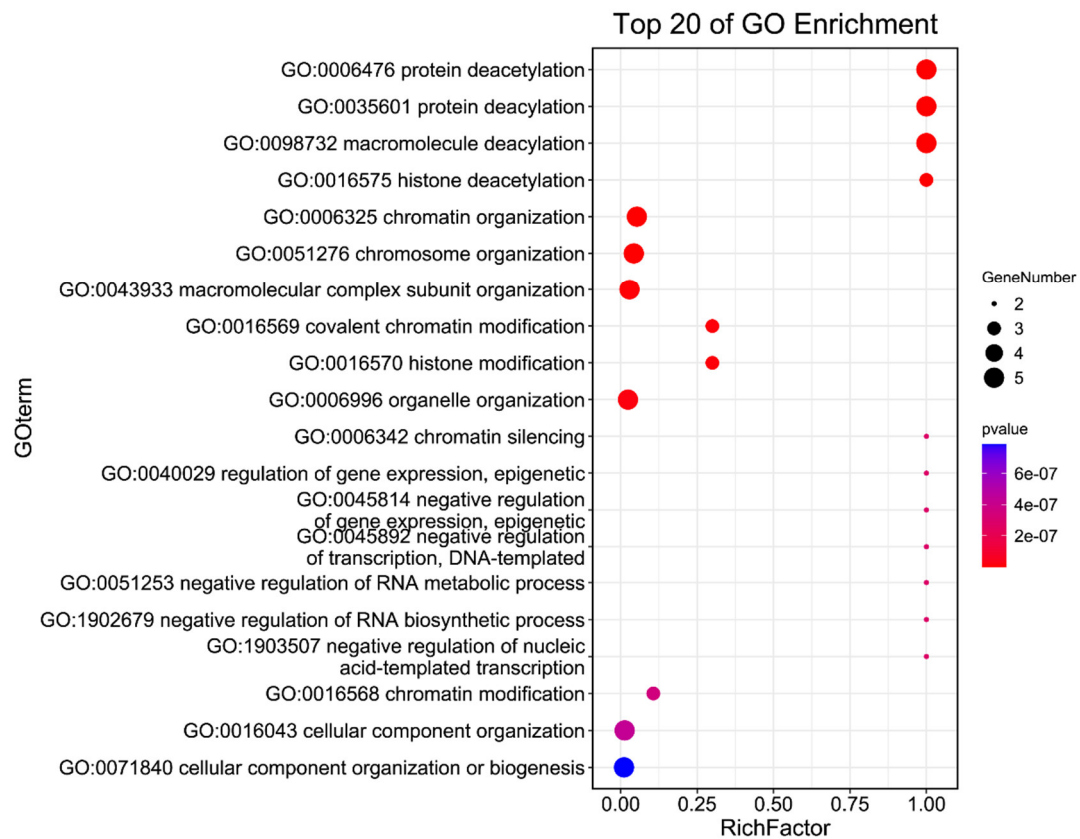

Figure S8 Dot plot of PmHDACs GO enrichment analysis.

|           |                                                                                                                         |     |
|-----------|-------------------------------------------------------------------------------------------------------------------------|-----|
| AtHDT1    | MEFWGIEVKSQKPVTVTEEGILTHVSOALGECNKKKEGFVPLHVKVGNNQNLVGLTLSTENIPQLFCDLVFDKEFELSHTWGRKGSVYVGV                             | 92  |
| AtHDT2    | MEFWGVAITPKNATKVTEEDSLVHISQASILDCTVKSGESVVLSTVVGAKLVLGTLSDKFPQISFDLVFDKEFELSHSGTKANVHFVGY                               | 91  |
| AtHDT3    | MEFWGVEVKNKGKPLHLDELGLDRLVHISQALGESKNNVTEPQLYVTVGSDKLVLGTLSHKFPQLSTELVLERNPALSHTWKNGSVFFSGY                             | 92  |
| PtHDT903  | MEFWGVEVKGEPKLVESGDGFLHLHISQACIGAKKDKGNEVCLFVNFDQKLVLGTLSEHKFPQLPFDLVFEKDFELSHNLKNGSVFFSGY                              | 93  |
| PtHDT902  | MSSMEFWGVEVKGEPKLVESGDGFLHISQALGESKKNESVPLFLKLDEKKLVLGTLSPDKPQLSFDLVFEKDFELSHNLKNGSVFFSGY                               | 95  |
| PtHDT901  | MSSMEFWGVEVKGEPKLVESGDGFLHISQALGESKKNESVPLFLKLDEKKLVLGTLSPENIPQLSFDLVFEKDFELSHNLKNGSVFFSGY                              | 94  |
| MdHDT1-2  | MEFWGVEVKGEPKLVESGDGFLHISQALGESKKNESVPLFLKLDEKKLVLGTLSPDKPQLSFDLVFEKDFELSHNLKNGSVFFSGY                                  | 91  |
| MdHDT1-3  | MEFWGVEVKGEPKLVESGDGFLHISQALGESKKNESVPLFLKLDEKKLVLGTLSPDKPQLSFDLVFEKDFELSHNLKNGSVFFSGY                                  | 108 |
| MdHDT1-1  | MISMSVSGLRCDAINVCCSLNNDVSFVGLGVKVEKAGEPLKVVVEESYVHLSHATLGELKKGGDQCVIHVKVGDNKLVLANLSSDKPQLSFDLVFEKDFELSHNLKNGSVFFSGY     | 108 |
| PmHDT1    | MEFWGVEVKGAGEPVKYVEVDGKVVHLSQACIGETKKGADQGVISVKIDDKKFLVGLTSSDKFPQLFLDLVFEKDFELSHNLKNGSVFFSGY                            | 89  |
| PmHDT3    | MEFWGVEVKSQGSVSVEEKNKVVHLSQACIGETKKGADQGVISVKIDDKKFLVGLTSSDKFPQLFLDLVFEKDFELSHNLKNGSVFFSGY                              | 92  |
| ParHDT1   | MEFWGVEVKGAGEPVKYVEVDGKVVHLSQACIGETKKGADQGVISVKIDDKKFLVGLTSSDKFPQLFLDLVFEKDFELSHNLKNGSVFFSGY                            | 91  |
| PpHDT1    | MEFWGVEVKGAGEPVKYVEVDGKVVHLSQACIGETKKGADQGVISVKIDDKKFLVGLTSSDKFPQLFLDLVFEKDFELSHNLKNGSVFFSGY                            | 113 |
| PpHDT3    | MEFWGVEVKSQGSVSVEEKNKVVHLSQACIGETKKGADQGVISVKIDDKKFLVGLTSSDKFPQLFLDLVFEKDFELSHNLKNGSVFFSGY                              | 92  |
| PsHDT1    | MEFWGVEVKGAGEPVKYVEVDGKVVHLSQACIGETKKGADQGVISVKIDDKKFLVGLTSSDKFPQLFLDLVFEKDFELSHNLKNGSVFFSGY                            | 91  |
| PsHDT3    | MEFWGVEVKSQGSVSVEEKNKVVHLSQACIGETKKGADQGVISVKIDDKKFLVGLTSSDKFPQLFLDLVFEKDFELSHNLKNGSVFFSGY                              | 92  |
| PyHDT1    | MEFWGVEVKGAGEPVKYVEVDGKVVHLSQACIGETKKGADQGVISVKIDDKKFLVGLTSSDKFPQLFLDLVFEKDFELSHNLKNGSVFFSGY                            | 91  |
| PavHDT1   | MEFWGVEVKGAGEPVKYVEVDGKVVHLSQACIGETKKGADQGVISVKIDDKKFLVGLTSSDKFPQLFLDLVFEKDFELSHNLKNGSVFFSGY                            | 14  |
| PavHDT2   | MEFWGVEVKGAGEPVKYVEVDGKVVHLSQACIGETKKGADQGVISVKIDDKKFLVGLTSSDKFPQLFLDLVFEKDFELSHNLKNGSVFFSGY                            | 0   |
| PyHDT1    | MEFWGVEVKGAGEPVKYVEVDGKVVHLSQACIGETKKGADQGVISVKIDDKKFLVGLTSSDKFPQLFLDLVFEKDFELSHNLKNGSVFFSGY                            | 7   |
| RcHDT1-2  | MEFWGVEVKGAGEPVKYVEVDGKVVHLSQACIGETKKGADQGVISVKIDDKKFLVGLTSSDKFPQLFLDLVFEKDFELSHNLKNGSVFFSGY                            | 0   |
| RcHDT3-1  | MEFWGVEVKGAGEPVKYVEVDGKVVHLSQACIGETKKGADQGVISVKIDDKKFLVGLTSSDKFPQLFLDLVFEKDFELSHNLKNGSVFFSGY                            | 0   |
| AtHDT4    | MEFWGIEIKPKKPKVIQKDGFMVHASQVITGDEVKVKKDETFAVYVIRIGDDENGFMIGNLSQKFPQFSIDLYLGHFEISHNLSTSSVYIIGY                           | 93  |
| RcHDT1-1  | MEFWGVEVKGAGEPLSVFEDQGNVVLHISQACIGESKKNESVPLFLKLDEKKLVLGTLSPDKPQLSFDLVFEKDFELSHNLKNGSVFFSGY                             | 91  |
| RcHDT3-2  | MANMKFWGVEVKSQGSVSVEEGLTLVHLSQACIGEVKKKGSDSISLFLVKTGDQKLVLGTLSPDKPQLSFDLVFEKDFELSHNLKNGSVFFSGY                          | 96  |
| Consensus |                                                                                                                         |     |
| AtHDT1    | KTPNIEPQGYSEEEEEEEVPA.....GNA.....AKAVAKPKPAEVKPAVD.....DEEEDSDSG.                                                      | 147 |
| AtHDT2    | KSPNIEQDDFT.....SSDEDVPEAVPA.....ATAVTANGNAGA.....KADTKPKPAEVKPAEEK.....PESEDEESDDEDE                                   | 165 |
| AtHDT3    | KVDASD.....PEPDELIDQLLEAQAAPKSAQKQVNFQLPNEDVKAQKQDADGSGEE.....DSSDDDS.....E                                             | 156 |
| PtHDT903  | KVAQPESSDSE.....FISGDEELLPVVDNCKEEAKQKPEPENAAKPDSSKQKVIKEPNKDGPKPENDDSSDEESSDSDGE                                       | 173 |
| PtHDT902  | QAAI.....PENISDFSDGDGE.....IPFEKVENVKFATGTDKAAPKPKKAN.....PVVPSKDDSDDDSD                                                | 155 |
| PtHDT901  | QVIP.....DDASDFSGDEEL.....FEFADAKIMKAATAKDKAAPKPKAT.....LVEPSIDDDSDSD                                                   | 153 |
| MdHDT1-2  | QTYIANESDEDDQSPD.....SSESEELPLNPFNGNGINEAKAPPPKTNIVKPESSGKQKVIKEPKD.....EDSDSDSD.....E                                  | 164 |
| MdHDT1-3  | LLCSAATESDEEDQSGKPYIILPFCFLFSVVMNLLFNLSYGVNFCMYYSSEELPLNPFNGNGINEAKAPPPKTNIVKPESSGKQKVIKEPKD.....EDSDSDSDSD             | 219 |
| MdHDT1-1  | TTCCFCCHRRIGRPI.....CSESEELPLNPFNGNGINEAKAPPPKTNIVKPESSGKQKVIKEPKD.....EDSDSDSDSD.....E                                 | 180 |
| PmHDT1    | .....EFDSSDEDVMEITQNG.....APSKTNIVKPEASEKQKVIKEPSND.....DDSDSDSD.....E                                                  | 139 |
| PmHDT3    | KLSLKYFCFDCN.....SSESEEDVLTVDNG.....KPVISGPKPLSTEDTKKAIKSEKQKASS.....DDSDSDSDSDVADGQTK                                  | 162 |
| ParHDT1   | QTLIGEDEEGDS.....EFDSSDEDVMEITQNG.....MPAPSKTNIVKPEASEKQKVIKEPTND.....DDSDSDSD.....E                                    | 156 |
| PpHDT1    | QTLIGEYFPNNCANWLFFS.....AYVEFDSSDEDVMEITQNG.....MPAPSKTNIVKPEASEKQKVIKEPSND.....DDSDSDSD.....E                          | 188 |
| PpHDT3    | KLSLNL.....SSESEEDVLTVDNG.....KPVISGPKPLSTEDTKKAIKSEKQKASS.....DDSDSDSDSDVADGQTK                                        | 160 |
| PsHDT1    | QTLIGEDEEGDS.....EFDSSDEDVMEITQNG.....IPAPSKTNIVKPEASEKQKVIKEPSND.....DDSDSDSD.....E                                    | 156 |
| PsHDT3    | KLSLNL.....SSESEEDVLTVDNG.....KPVISGPKPLSTEDTKKAIKSEKQKASS.....DDSDSDSDSDVADGQTK                                        | 160 |
| PyHDT1    | KLSLNL.....SSESEEDVLTVDNG.....KPVISGPKPLSTEDTKKAIKSEKQKASS.....DDSDSDSDSDVADGQTK                                        | 160 |
| PavHDT1   | QTLIGEYFPNDS.NRLFFS.....AYVEFDSSDEDVMEITQNG.....IPAPSKTNIVKPEASEKQKVIKEPSND.....DDSDSDSD.....E                          | 122 |
| PavHDT2   | .....TGDN.....SSESEEDVLTVDNG.....KPVISGPKPLSTEDTKKAIKSEKQKASS.....DDSDSDSDSDVADGQTK                                     | 77  |
| PyHDT1    | NRMFPESES.....SEELPMIAENKGVENAKPAIAKQNAVKPESSGKQKVIKEPKD.....EADSDSDA.....S                                             | 0   |
| RcHDT1-2  | .....MMAN.....LKQSKELIRSVKMAVMMK.....                                                                                   | 71  |
| RcHDT3-1  | .....ARDELDEEDSD.....SELCEYMEQQAALFQNEINPEED.....DESDESD.....E                                                          | 25  |
| AtHDT4    | RTED.....GDEYP.....STIFLYFSVIDGSFY.....                                                                                 | 140 |
| RcHDT1-1  | QSVN.....IANTG.....YFPC.....                                                                                            | 115 |
| RcHDT3-2  | .....                                                                                                                   | 105 |
| Consensus |                                                                                                                         |     |
| AtHDT1    | MEEDSDSG.....EDSE.....EETPTPKPKASKKKANITTPKAPVSAKKA.....VAVTPORTDEKKKGK.....AANGSPKSA                                   | 216 |
| AtHDT2    | SEDDSDSEKGMVDVEDSDSDDEEDSEDEEETPTPKPEPINKKRNESVSKTPVSGKKAAPAAAPASTPKTEKKKGKHTATPHPAKKGKSE.....VNANGSPKSG                | 271 |
| AtHDT3    | NSGDDEEEKVTAESDSEEDSDSDDEEDSS.....EETPTPKPEPEPKKRSAPNNSKNPASNKKA.....FVT.....PDKTSGKKPHVHTATPHPSQAQKNGSGGSGTETSQOQTPKSA | 265 |
| PtHDT903  | SDDQAMMMANDEDESEDEDESDSDSDGDKPKKAEVKKKRSAPNNSKNPASNKKA.....FVT.....PDKTSGKKPHVHTATPHPSQAQKNGSGGSGTETSQOQTPKSA           | 280 |
| PtHDT902  | DSDEEDSDSGSGMSLEEDLDESDSDSEDEETPTPKAEVKKKRSAPNNSKNPASNKKA.....FVT.....PDKTSGKKPHVHTATPHPSQAQKNGSGGSGTETSQOQTPKSA        | 251 |
| PtHDT901  | DDSDDEEDSDSGSGMSLEEDLDESDSDSEDEETPTPKAEVKKKRSAPNNSKNPASNKKA.....FVT.....PDKTSGKKPHVHTATPHPSQAQKNGSGGSGTETSQOQTPKSA      | 247 |
| MdHDT1-2  | DDSDDEEDSDSDSGSGMSLEEDLDESDSDSEDEETPTPKAEVKKKRSAPNNSKNPASNKKA.....FVT.....PDKTSGKKPHVHTATPHPSQAQKNGSGGSGTETSQOQTPKSA    | 257 |
| MdHDT1-3  | DDSDDEEDSDSDSGSGMSLEEDLDESDSDSEDEETPTPKAEVKKKRSAPNNSKNPASNKKA.....FVT.....PDKTSGKKPHVHTATPHPSQAQKNGSGGSGTETSQOQTPKSA    | 320 |
| MdHDT1-1  | DDSDDEEDSDSDSGSGMSLEEDLDESDSDSEDEETPTPKAEVKKKRSAPNNSKNPASNKKA.....FVT.....PDKTSGKKPHVHTATPHPSQAQKNGSGGSGTETSQOQTPKSA    | 273 |
| PmHDT1    | SSDEGLGGF.....EDSSIE.....ASKKRPNSASKTEPVPAKKKA.....QYLRIFIGDKKAAHTATPHPAKKGKTEMTGDKPKFOTPKSGG                           | 218 |
| PmHDT3    | VKFEEGSSDEDESDSDSDSDSDDEEDSEETPKKADVSKKRPNSASKTEPVPAKKKA.....QYLRIFIGDKKAAHTATPHPAKKGKTEMTGDKPKFOTPKSGG                 | 266 |
| ParHDT1   | SSDEGLGGF.....EDSSIE.....ASKKRPNSASKTEPVPAKKKA.....QYLRIFIGDKKAAHTATPHPAKKGKTEMTGDKPKFOTPKSGG                           | 256 |
| PpHDT1    | SSDEGLGGF.....EDSSIE.....ASKKRPNSASKTEPVPAKKKA.....QYLRIFIGDKKAAHTATPHPAKKGKTEMTGDKPKFOTPKSGG                           | 290 |
| PpHDT3    | VKFEEGSSDEDESDSDSDSDSDDEEDSEETPKKADVSKKRPNSASKTEPVPAKKKA.....QYLRIFIGDKKAAHTATPHPAKKGKTEMTGDKPKFOTPKSGG                 | 267 |
| PsHDT1    | SSDEGLGGF.....EDSSIE.....ASKKRPNSASKTEPVPAKKKA.....QYLRIFIGDKKAAHTATPHPAKKGKTEMTGDKPKFOTPKSGG                           | 258 |
| PsHDT3    | VKIEEGSSDEDESDSDSDSDSDDEEDSEETPKKADVSKKRPNSASKTEPVPAKKKA.....QYLRIFIGDKKAAHTATPHPAKKGKTEMTGDKPKFOTPKSGG                 | 267 |
| PyHDT1    | SSDEGLGGF.....EDSSIE.....ASKKRPNSASKTEPVPAKKKA.....QYLRIFIGDKKAAHTATPHPAKKGKTEMTGDKPKFOTPKSGG                           | 189 |
| PavHDT1   | SSDEGLGGF.....EDSSIE.....ASKKRPNSASKTEPVPAKKKA.....QYLRIFIGDKKAAHTATPHPAKKGKTEMTGDKPKFOTPKSGG                           | 244 |
| PavHDT2   | VKFEEGSSDEDESDSDSDSDSDDEEDSEETPKKADVSKKRPNSASKTEPVPAKKKA.....QYLRIFIGDKKAAHTATPHPAKKGKTEMTGDKPKFOTPKSGG                 | 184 |
| PyHDT1    | .....MRMSRWKSHR.....M.....ASKKRPNSASKTEPVPAKKKA.....QYLRIFIGDKKAAHTATPHPAKKGKTEMTGDKPKFOTPKSGG                          | 75  |
| RcHDT1-2  | DMDSDDLIL.....EDSSIE.....ASKKRPNSASKTEPVPAKKKA.....QYLRIFIGDKKAAHTATPHPAKKGKTEMTGDKPKFOTPKSGG                           | 175 |
| RcHDT3-1  | .....KAVMMMMMMVVG.....SNKRAAESKTPVQKKKA.....FVT.....PEKTSKKKGAVHTATPHPSQAQKNGSGGSGTETSQOQTPKSA                          | 99  |
| AtHDT4    | .....MGLDEEDSDSD.....EEDVEAEAPLKVAFPSKKMEN.....GAFELAKGG.....KKNKSSGSK.....KRCFPCG                                      | 198 |
| RcHDT1-1  | .....                                                                                                                   | 115 |
| RcHDT3-2  | .....                                                                                                                   | 105 |
| Consensus |                                                                                                                         |     |
| AtHDT1    | Q.VSCG.SCKTNSGALSHNKAKHAK.....                                                                                          | 245 |
| AtHDT2    | Q.SSGGNNNKKPNSGKFGSGNNKSGNKGGKGR.....                                                                                   | 305 |
| AtHDT3    | .....AFGCKSTRITTSKGLSHTKAKHSA.....                                                                                      | 294 |
| PtHDT903  | .....CNSCNRSFGSNGALSHSKAKHSA.....                                                                                       | 305 |
| PtHDT902  | .....NFSCKSCERSFGSGALSHSKAKHGD.....                                                                                     | 279 |
| PtHDT901  | .....NFSCKSCDKAFSGGALSHSKAKHGD.....                                                                                     | 275 |
| MdHDT1-2  | G.DHSCKTCSKSNFGSNGALSHSHNKAKHGA.....                                                                                    | 286 |
| MdHDT1-3  | G.DHSCKCPNKSNSNGALSHSHNKAKHGA.....                                                                                      | 349 |
| MdHDT1-1  | G.DHSCKTCSKSNFGSNGALSHSHNKAKHGA.....                                                                                    | 302 |
| PmHDT1    | .....EHSCKPCKSNFGSNGALSHSHNKAKHSA.....                                                                                  | 246 |
| PmHDT3    | .....TFNQCSCNRSNSNGALSHTKAKHSA.....                                                                                     | 295 |
| ParHDT1   | .....EHSCKPCKSNFGSNGALSHSHNKAKHSA.....                                                                                  | 286 |
| PpHDT1    | .....EHSCKPCKSNFGSNGALSHSHNKAKHSA.....                                                                                  | 318 |
| PpHDT3    | .....TFNQCSCNRSNSNGALSHTKAKHSA.....                                                                                     | 296 |
| PsHDT1    | .....EHSCKPCKSNFGSNGALSHSHNKAKHSA.....                                                                                  | 286 |
| PsHDT3    | .....AFNQCSCNRSNSNGALSHTKAKHSA.....                                                                                     | 296 |
| PyHDT1    | .....TFNQCSCNRSNSNGALSHTKAKHSA.....                                                                                     | 218 |
| PavHDT1   | .....EHSCKPCKSNFGSNGALSHSHNKAKHSA.....                                                                                  | 272 |
| PavHDT2   | .....TFNQCSCNRSNSNGALSHTKAKHSA.....                                                                                     | 213 |
| PyHDT1    | .....EHSCKPCKSNFGSNGALSHSHNKAKHSA.....                                                                                  | 103 |
| RcHDT1-2  | G.NFSQSCSKSPGSGNGALSHSHNKAKHSA.....                                                                                     | 205 |
| RcHDT3-1  | GGTFPCDPNRSNSNGALSHTKAKHGA.....                                                                                         | 130 |
| AtHDT4    | .....PSCKK.....                                                                                                         | 203 |
| RcHDT1-1  | .....                                                                                                                   | 115 |
| RcHDT3-2  | .....                                                                                                                   | 105 |
| Consensus |                                                                                                                         |     |

Figure S9 Sequences alignment of all HD2 family proteins in *Arabidopsis*, *P. trichocarpa* and 8



## Rosaceae plants.

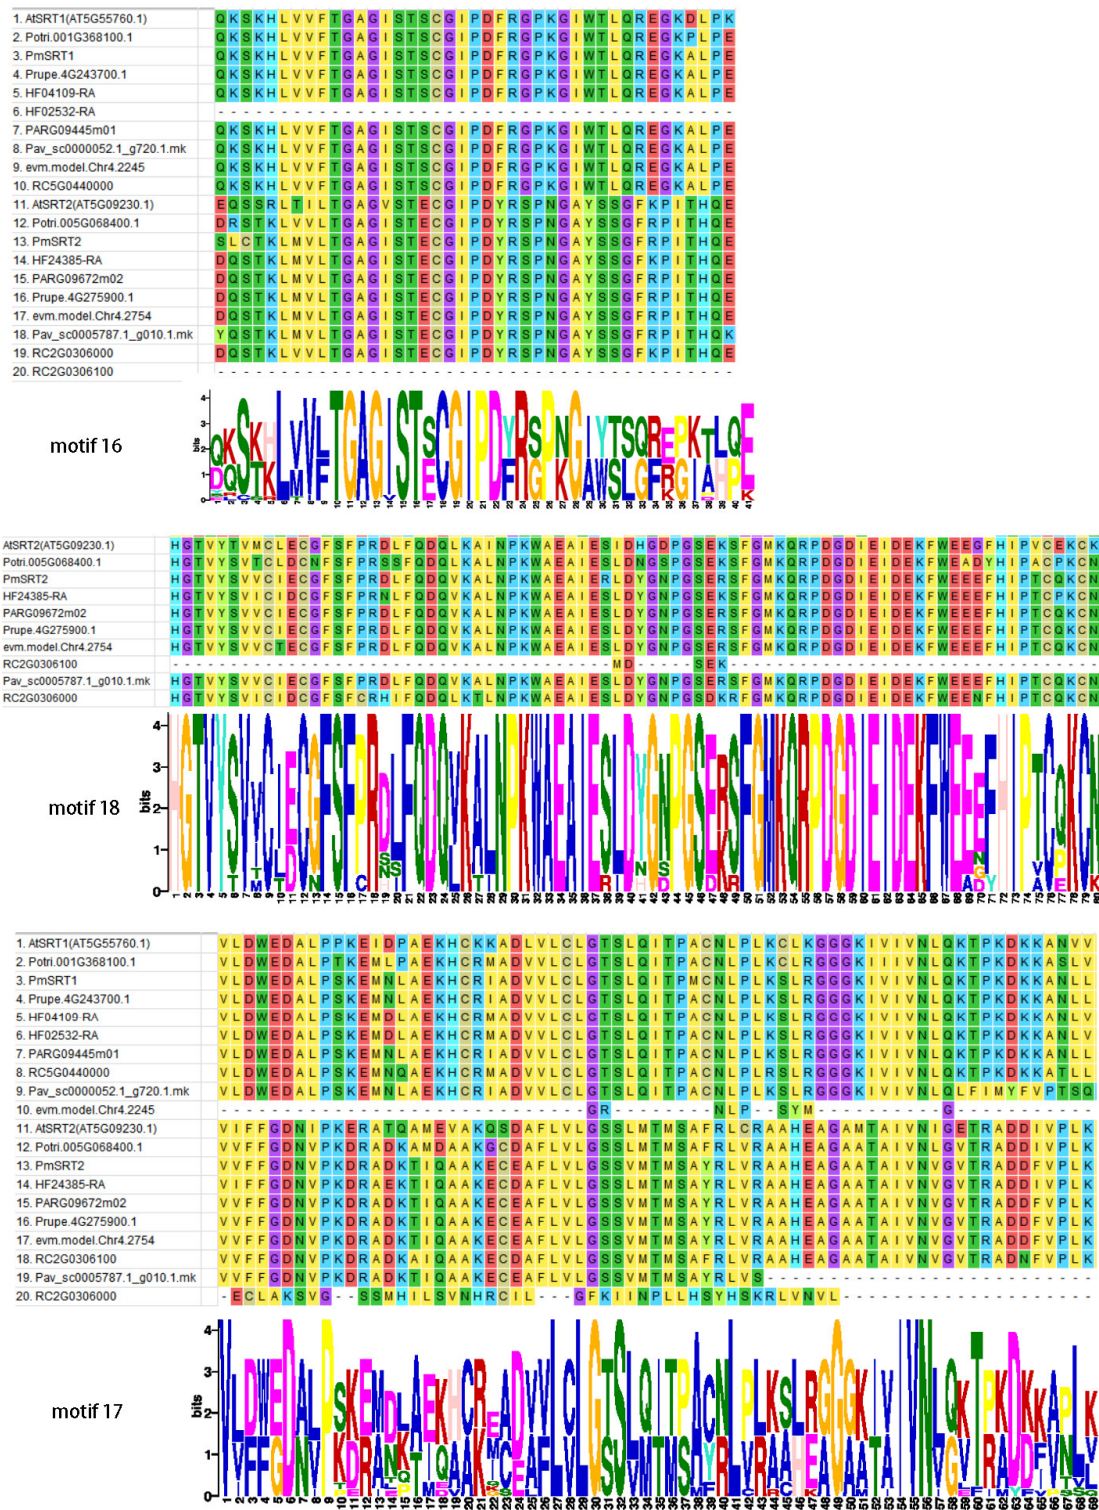

Figure S10 Motif and sequences analysis of *SIR2* genes in 10 plants.
