# Supplementary figures and images for: HDACs Gene Family Analysis of Eight Rosaceae Genomes Reveals the Genomic Marker of Cold Stress in Prunus mume
Source: MDPI journal article supplement (doi:10.3390/ijms23115957), 2022-05-25

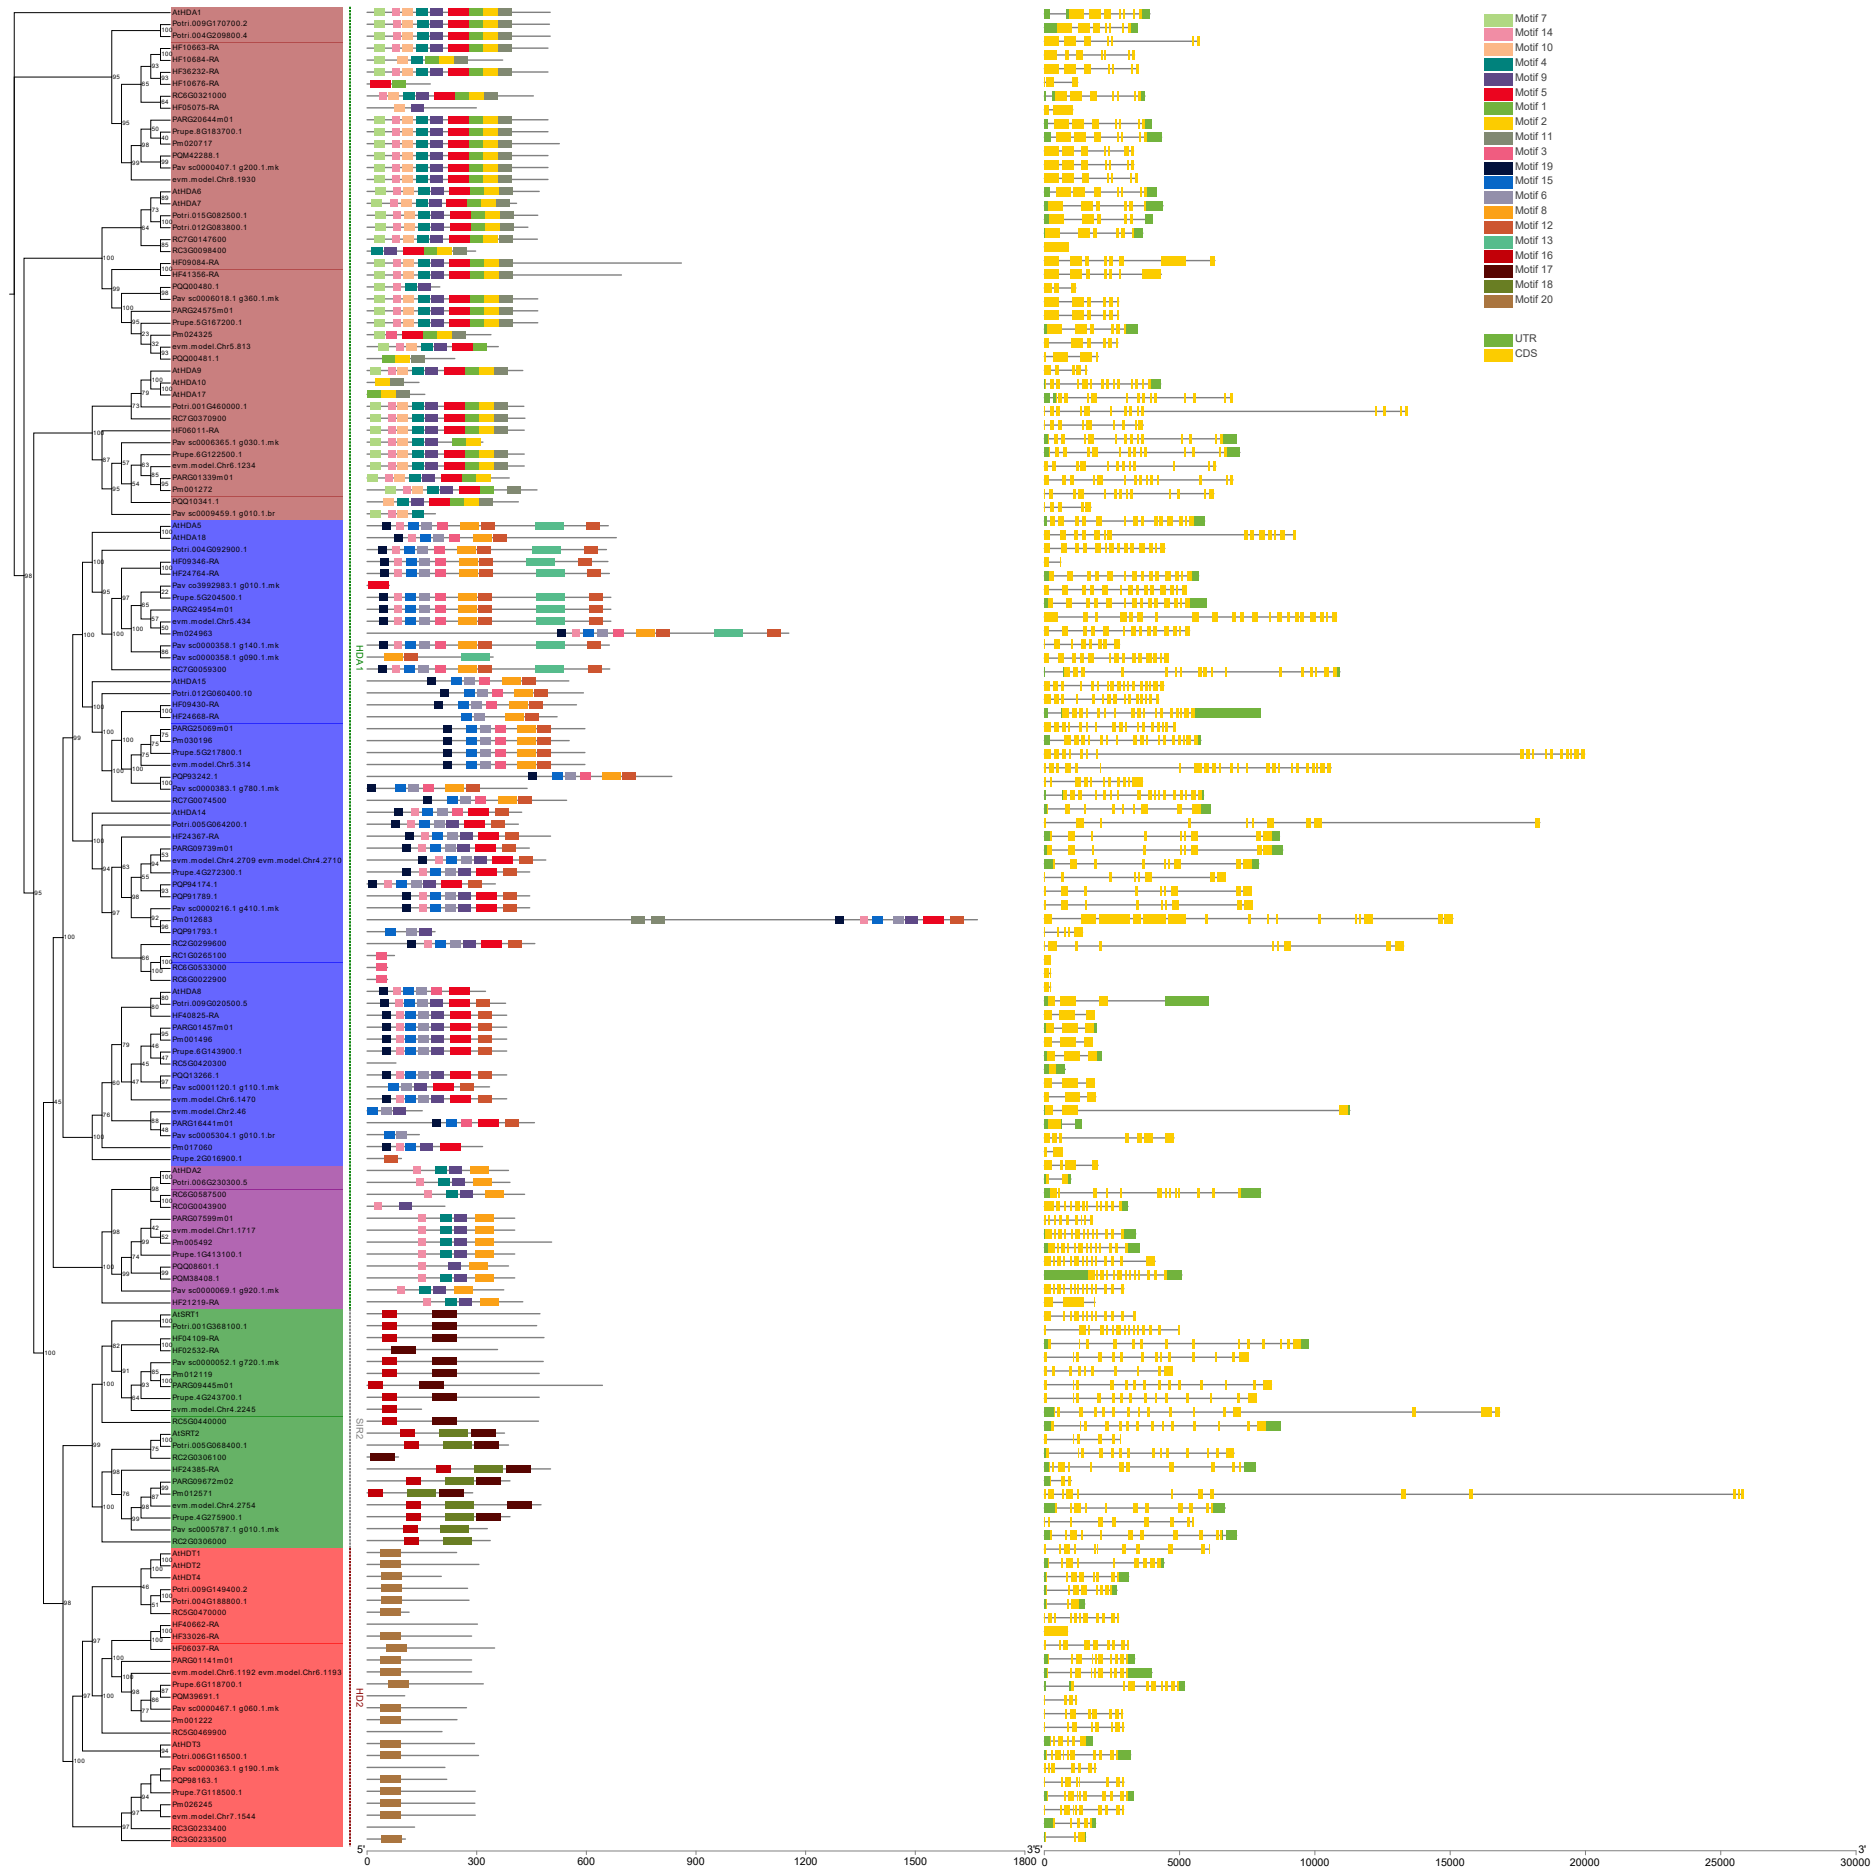

Supplement: s1 [file s1]
